# Supplementary material for: TMC7 deficiency causes acrosome biogenesis defects and male infertility in mice
Source: bioRxiv preprint, doi:10.1101/2024.01.18.576276, version 3 (2024-06-08)
Supplement: Supplementary Table [file 576276_file04.docx]

Table1. Fertility testing of *Tmc7*+/-, *Tmc7*-/- male mice and *Tmc7*-/- female mice.

| **Male** | **Female** | **Num of pups/litter** |
| --- | --- | --- |
| *Tmc7-/-* | WT * 2 | None |
| *Tmc7-/-* | WT * 2 | None |
| *Tmc7-/-* | WT * 2 | None |
| *Tmc7+/-* | *Tmc7+/-** 2 | 8,5,6,8 |
| *Tmc7+/-* | *Tmc7-/-* * 2 | 9,10,11,8 |
| *Tmc7+/-* | *Tmc7-/-* * 2 | 8,6,5,8 |
